# Supplementary material for: Targeting Malaria Hotspots to Reduce Transmission Incidence in Senegal
Source: Preprints.org preprint supplement (doi:10.20944/preprints202009.0716.v1), 2020-09-29
Supplement: Supplementary file 1 [file supplementary]

## Sheet: Feuil1
numvil	nomvil	x	y	ncoord	sequence	pop2010	pop2009	pop2008	n	e	sem1	sem2	sem3	sem4	sem5	sem6	sem7	sem8	sem9	sem10	sem11	sem12	sem13	sem14	sem15	sem16	sem17	sem18	sem19	sem20	sem21	sem22	sem23	sem24	sem25	sem26	sem27	sem28	sem29	sem30	sem31	sem32	sem33	sem34	sem35	sem36	sem37	sem38	sem39
1228	NDIOROKH	-17.03	14.47	125	20	3139	2980	2689	14.471	-17.0303	0	0	0	0	0	0	0	0	0	0	0	0	0	0	0	0	0	0	0	0	0	0	0	0	0	0	0	0	0	0	0	0	0	0	0	0	0	0	0
1131	SALY GOLF	-17.02	14.45	103	26	735	705	712	14.4483	-17.0167	0	0	0	0	0	0	0	0	0	0	0	0	0	0	0	0	0	0	0	0	0	0	0	0	0	0	0	0	0	0	0	0	0	0	0	0	0	0	0
1133	SALY KOULANG	-17.02	14.44	95	25	3472	3381	3370	14.4412	-17.0178	0	0	0	0	0	0	0	0	0	0	0	0	0	0	0	0	0	0	0	0	0	0	0	0	0	0	0	0	0	0	0	0	0	0	0	0	0	0	0
1135	SALY PORTUDAL	-17.02	14.44	98	27	251	252	224	14.4438	-17.015	0	0	0	0	0	0	0	0	0	0	0	0	0	0	0	0	0	0	0	0	0	0	0	0	0	0	0	0	0	0	0	0	0	0	0	0	0	0	0
1254	SINTHIANE	-17.02	14.48	136	24	1430	1384	1307	14.4793	-17.0205	0	0	0	0	0	0	0	0	0	0	0	0	0	0	0	0	0	0	0	0	0	0	0	0	0	0	0	0	0	0	0	0	0	0	0	0	0	0	0
1175	DIAMAGUENE	-17.01	14.52	166	31	5295	5131	5040	14.5172	-17.0067	0	0	0	0	0	0	0	0	0	0	0	0	0	0	0	0	0	0	0	0	0	0	0	0	0	0	0	0	0	0	0	0	0	0	0	0	0	0	0
1132	SALY JOSEPH	-17.01	14.46	114	30	4688	4429	4292	14.4568	-17.0085	0	0	0	0	0	0	0	0	0	0	0	0	0	0	0	0	0	0	0	0	0	0	0	0	0	0	0	0	0	0	0	0	0	0	0	0	0	0	0
1138	SALY-DAROU SALAM	-17.01	14.45	106	29	1260	1031	1032	14.451	-17.0132	0	0	0	0	0	0	0	0	0	0	0	0	0	0	0	0	0	0	0	0	0	0	0	0	0	0	0	0	0	0	0	0	0	0	0	0	0	0	0
1173	DAROU MINAME - DAROU SALAM	-17	14.51	159	58	5777	5686	5835	14.5095	-17.0017	0	0	0	0	0	0	0	0	0	0	0	0	0	0	0	0	0	0	0	0	0	0	0	0	0	0	0	0	0	0	0	0	0	0	0	0	0	0	0
1194	KEUR GONDE	-17	14.51	157	35	9	0	0	14.5075	-17.0037	0	0	0	0	0	0	0	0	0	0	0	0	0	0	0	0	0	0	0	0	0	0	0	0	0	0	0	0	0	0	0	0	0	0	0	0	0	0	0
1125	SALY BAMBARA	-17	14.44	91	64	7433	6225	5837	14.4367	-16.9968	0	0	0	0	0	0	0	0	0	0	0	0	0	0	0	0	0	0	0	0	0	0	0	0	0	0	0	0	0	0	0	0	0	0	0	0	0	0	0
1130	SALY EXTENSION	-17	14.44	99	40	667	632	617	14.4447	-17.0028	0	0	0	0	0	0	0	0	0	0	0	0	0	0	0	0	0	0	0	0	0	0	0	0	0	0	0	0	0	0	0	0	0	0	0	0	0	0	0
1134	SALY NIAKH NIAKHAL	-17	14.44	90	63	647	598	625	14.4357	-16.9995	0	0	0	0	0	0	0	0	0	0	0	0	0	0	0	0	0	0	0	0	0	0	0	0	0	0	0	0	0	0	0	0	0	0	0	0	0	0	0
1137	SALY VELINGARA	-17	14.45	104	65	470	457	437	14.4505	-16.9953	0	0	0	0	0	0	0	0	0	0	0	0	0	0	0	0	0	0	0	0	0	0	0	0	0	0	0	0	0	0	0	0	0	0	0	0	0	0	0
1190	GANDIGAL	-16.99	14.48	131	67	669	651	642	14.475	-16.9907	0	0	0	0	0	0	0	0	0	0	0	0	0	0	0	0	0	0	0	0	0	0	0	0	0	0	0	0	0	0	0	0	0	0	0	1	0	0	0
1126	SALY CARREFOUR	-16.99	14.44	94	69	659	634	623	14.4393	-16.9877	0	0	0	0	0	0	0	0	0	0	0	0	0	0	0	0	0	0	0	0	0	0	0	0	0	0	0	0	0	0	0	0	0	0	0	0	0	0	0
1127	SALY DAROU	-16.99	14.43	82	68	590	558	497	14.4315	-16.989	0	0	0	0	0	0	0	0	0	0	0	0	0	0	0	0	0	0	0	0	0	0	0	0	0	0	0	0	0	0	0	0	0	0	0	0	0	0	0
1128	SALY DAROU PEULH	-16.99	14.43	84	66	303	23	1	14.433	-16.9925	0	0	0	0	0	0	0	0	0	0	0	0	0	0	0	0	0	0	0	0	0	0	0	0	0	0	0	0	0	0	0	0	0	0	0	0	0	0	0
1164	GRAND MBOUR	-16.98	14.44	89	71	900	869	880	14.4355	-16.9807	0	0	0	0	0	0	0	0	0	0	0	0	0	0	0	0	0	0	0	0	0	0	0	0	0	1	0	0	0	1	0	1	0	0	0	2	0	0	1
1166	MEDINE EXTENSION	-16.98	14.44	96	72	462	416	387	14.4422	-16.9755	0	0	0	0	0	0	0	0	0	0	0	0	0	0	0	0	0	0	0	0	0	0	0	0	0	0	0	0	0	0	0	0	0	0	0	0	0	0	0
1129	SALY DIAKSAO	-16.98	14.45	102	70	675	692	715	14.4473	-16.982	0	0	0	0	0	0	0	0	0	0	0	0	0	0	0	0	0	0	0	0	0	0	0	0	0	0	0	0	0	0	0	0	0	0	0	0	0	0	0
1094	COCAYE	-16.97	14.46	120	74	300	290	272	14.4638	-16.9687	0	0	0	0	0	0	0	0	0	0	0	0	0	0	0	0	0	0	0	0	0	0	0	0	0	0	0	0	0	0	0	0	0	0	0	0	0	0	0
1114	MALICOUNDA BAMBARA	-16.97	14.46	116	73	270	22	5	14.4612	-16.9698	0	0	0	0	0	0	0	0	1	0	1	1	0	0	1	1	0	0	0	1	0	0	0	1	0	0	0	1	0	0	0	2	1	0	0	0	1	2	0
1165	MEDINE	-16.97	14.43	87	83	4123	2623	2535	14.4347	-16.9658	0	0	0	0	0	0	0	0	0	0	0	0	0	0	0	0	0	0	0	0	0	0	1	0	0	0	1	0	0	0	0	0	0	0	0	1	0	0	0
1172	THIOCE-OUEST	-16.97	14.42	69	84	1157	1130	994	14.4175	-16.9652	0	0	0	0	0	0	0	0	0	0	0	0	0	0	0	0	0	0	0	0	0	0	0	0	0	0	0	0	0	1	0	0	1	3	0	0	0	0	1
1215	DARA S. CHEIKH MBACKE	-16.96	14.53	179	85	175	156	143	14.53	-16.9637	0	0	0	0	0	0	0	0	0	0	0	0	0	0	0	0	0	0	0	0	0	0	0	0	0	0	0	0	0	0	0	0	0	0	0	0	0	0	0
1167	MEDINE/LIBERTE	-16.96	14.43	88	86	3902	3891	4061	14.4348	-16.9613	0	0	0	0	0	0	0	0	0	0	0	0	0	0	0	0	0	0	0	0	0	0	0	0	0	0	0	0	0	0	0	0	0	0	1	0	0	1	0
1169	SANTESSOU	-16.96	14.41	63	88	12493	11152	11205	14.4137	-16.9577	0	0	0	0	0	0	0	0	0	0	0	0	0	0	0	0	0	0	0	0	0	0	0	0	0	0	0	0	0	0	0	0	0	0	0	0	1	0	0
1171	THIOCE EST	-16.96	14.42	67	87	1519	1333	1253	14.4165	-16.9598	0	0	0	0	0	0	0	0	0	0	0	0	0	0	0	0	0	0	0	0	0	0	0	0	0	0	0	0	0	0	1	0	1	1	1	0	0	0	1
1161	DAROU SALAM	-16.95	14.41	64	89	329	29	6	14.4138	-16.9537	0	0	0	0	0	0	0	0	0	0	0	0	0	0	0	0	0	0	0	0	0	0	0	1	0	1	0	0	1	0	0	0	0	0	0	0	1	0	1
1095	DAROU NDIEYE	-16.95	14.47	126	93	492	449	456	14.472	-16.9462	0	0	0	0	0	0	0	0	0	0	0	0	0	0	0	0	0	0	0	0	0	0	0	0	0	0	0	0	0	0	0	0	0	0	0	0	0	0	0
1163	GOUY MOURIDE	-16.95	14.41	58	91	607	586	554	14.4108	-16.953	0	0	0	0	0	0	0	0	0	0	0	0	0	0	0	0	0	0	0	0	0	1	0	0	0	0	0	0	0	0	0	0	0	0	0	0	0	0	0
1116	MBALLING	-16.95	14.38	42	105	656	619	592	14.379	-16.945	0	0	0	0	0	0	0	0	0	0	0	0	0	0	0	0	0	0	0	0	0	0	0	0	0	0	0	0	0	0	0	0	0	0	0	0	0	2	1
1168	ONCAD	-16.95	14.42	71	92	452	457	461	14.422	-16.9502	0	0	0	0	0	0	0	0	0	0	0	0	0	0	0	0	0	0	0	0	0	0	0	0	0	0	0	0	0	0	0	0	0	0	0	2	1	0	1
1219	KEUR DIA DIA	-16.94	14.52	165	106	1388	1263	1241	14.5162	-16.9398	0	0	0	0	0	0	0	0	0	0	0	0	0	0	0	0	0	0	0	0	0	0	0	0	0	0	0	0	0	0	0	0	0	0	0	0	0	0	0
1214	BABEL	-16.93	14.53	184	113	3442	3302	3195	14.5343	-16.9343	0	0	0	0	0	0	0	0	0	0	0	0	0	0	0	0	0	0	0	0	0	0	0	0	0	0	0	0	0	0	0	0	0	0	0	0	0	0	0
1141	SINTHIOU MBADANE PEULH	-16.93	14.41	55	118	3412	3001	2850	14.4057	-16.9323	0	0	0	0	0	0	0	0	0	0	0	0	0	0	0	0	0	0	0	0	0	0	0	0	0	0	0	0	0	0	0	0	0	0	0	0	0	0	0
1101	FANDANE OUOLOF	-16.92	14.46	118	124	1625	1554	1483	14.463	-16.9208	0	0	0	0	0	0	0	0	0	0	0	0	0	0	0	0	0	0	0	0	0	0	0	0	0	0	0	0	0	0	0	0	0	0	0	0	0	0	0
1106	KEUR AIMEROU	-16.92	14.49	145	125	777	720	665	14.4907	-16.9202	0	0	0	0	0	0	0	0	0	0	0	0	0	0	0	0	0	0	0	0	0	0	0	0	0	0	0	0	0	0	0	0	0	0	0	0	0	0	0
1220	KEUR MASSOUKA	-16.92	14.55	194	119	1516	1464	1429	14.5498	-16.9212	0	0	0	0	0	0	0	0	0	0	0	0	0	0	0	0	0	0	0	0	0	0	0	1	0	0	0	0	0	0	0	0	0	0	2	0	0	1	0
1225	NDIARMEO	-16.92	14.51	160	143	321	312	304	14.5117	-16.9165	0	0	0	0	0	0	0	0	0	0	0	0	0	0	0	0	0	0	0	0	0	0	0	0	0	0	0	0	0	0	0	0	0	0	0	0	0	0	0
1124	POINTE SARENE	-16.92	14.29	6	142	714	649	688	14.2878	-16.9168	1	1	0	0	0	0	0	0	0	0	0	0	0	0	0	0	0	0	0	0	0	0	0	0	0	0	0	1	2	1	0	0	0	0	0	1	2	0	1
1098	FANDANE BOULE	-16.91	14.46	112	144	1497	1461	1383	14.4575	-16.9137	0	0	0	0	0	0	0	0	0	0	0	0	0	0	0	0	0	0	0	0	0	0	0	0	0	0	0	0	0	0	0	0	0	0	0	0	0	0	0
1158	TAKHOUM/KEUR MORY	-16.91	14.48	138	148	1910	1904	1885	14.4828	-16.9123	0	0	0	0	0	0	0	0	0	0	0	0	0	0	0	0	0	0	0	0	0	0	0	0	0	0	0	0	0	0	0	0	0	0	0	0	0	0	0
1140	SINTHIOU MBADANE	-16.9	14.41	61	149	1836	1751	1468	14.4132	-16.8978	0	0	0	0	0	0	0	0	0	0	0	0	0	0	0	0	0	0	0	0	0	0	0	0	0	0	0	0	0	0	0	0	0	0	0	0	0	0	0
[truncated: 222 more columns]
